# Supplementary material for: The Isolation and Characterization of Bacteriophages Infecting Avian Pathogenic Escherichia coli O1, O2 and O78 Strains
Source: MDPI journal article supplement (doi:10.3390/v15102095), 2023-10-16
Supplement: s1 [file s1]

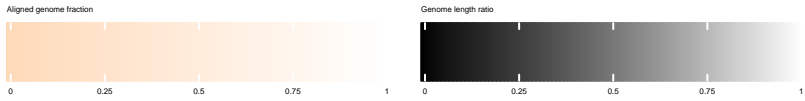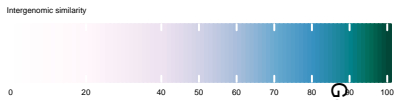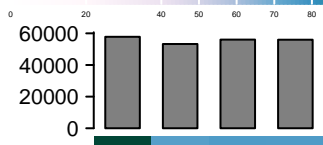

Escherichia\_phage\_vB\_EcoS\_AVIO78A,\_complete\_genome

NC\_047786.1\_Salmonella\_phage\_vB\_SenS\_Sasha,\_complete\_genome

KY002061.1\_Salmonella\_phage\_vB\_SenS\_Sergei,\_complete\_genome

MH586730.1\_Salmonella\_phage\_Solent,\_complete\_genome

|       |       |       |       |                                                             |
|-------|-------|-------|-------|-------------------------------------------------------------|
| 100.0 | 73.8  | 75.5  | 75.4  | Escherichia_phage_vB_EcoS_AVIO78A,_complete_genome          |
| 0.8   |       |       |       |                                                             |
| 0.9   | 100.0 | 93.6  | 93.7  | NC_047786.1_Salmonella_phage_vB_SenS_Sasha,_complete_genome |
| 0.8   |       |       |       |                                                             |
| 0.8   | 1.1   |       |       |                                                             |
| 1.0   | 1.0   | 100.0 | 99.9  | KY002061.1_Salmonella_phage_vB_SenS_Sergei,_complete_genome |
| 0.8   | 1.2   |       |       |                                                             |
| 0.8   | 0.9   | 1.0   |       |                                                             |
| 1.0   | 1.0   | 1.0   | 100.0 | MH586730.1_Salmonella_phage_Solent,_complete_genome         |
| 0.8   | 1.0   | 1.0   |       |                                                             |
