# Supplementary material for: The Isolation and Characterization of Bacteriophages Infecting Avian Pathogenic Escherichia coli O1, O2 and O78 Strains
Source: MDPI journal article supplement (doi:10.3390/v15102095), 2023-10-16
Supplement: s1 [file s1]

**Table S1:** *E. coli* strains used during the study.

| <i>E. coli</i> Strain | Serogroup | Origin                 | Year Isolated |
|-----------------------|-----------|------------------------|---------------|
| ECL20834              | O1        | Broiler<br>Pericardium | 2016          |
| ECL20885*             | O1        | Broiler Liver          | 2016          |
| ECL21443*             | O2        | Broiler Liver          | 2018          |
| ECL22102              | O78       | Broiler<br>Pericardium | 2017          |
| ECL20719              | O78       | Broiler Liver          | 2015          |
| ECL23026*             | O78       | Broiler Liver          | 2018          |

\*Host used for initial phage isolation.

**Table S2:** Antibigrams of isolates used in this study.

| Strain   | Serogroup | Gentamicin | Neomycin | Spectinomycin | Ceftiofur | Enrofloxacin | Sulfisoxazole | Trimethoprim | Colistin | Ampicillin | Tetracycline | Erythromycin | Penicillin | Clindamycin |                |
|----------|-----------|------------|----------|---------------|-----------|--------------|---------------|--------------|----------|------------|--------------|--------------|------------|-------------|----------------|
| ECL20834 | O1        | R          | S        | I             | R         | S            | R             | S            |          | R          | R            | ND           | ND         | ND          | R Resistant    |
| ECL20885 | O1        | R          | S        | I             | R         | S            | R             | S            |          | R          | R            | ND           | ND         | ND          | I Intermediate |
| ECL21443 | O2        | R          | S        | S             | I         | S            | R             | S            |          | R          | R            | ND           | ND         | ND          | S Sensitive    |
| ECL22102 | O78       | R          | S        | I             | S         | S            | R             | S            |          | I          | R            | ND           | ND         | ND          | ND Unknown     |
| ECL20719 | O78       | R          | S        | S             | S         | S            | R             | S            |          | R          | R            | ND           | ND         | ND          |                |
| ECL23026 | O78       | R          | S        | S             | S         | S            | S             | S            |          | R          | S            | R            | R          | R           |                |

**Table S3:** Phages chosen for further characterization in this study.

| Phage   | Phage Source | Host (Serogroup) | Plaque Morphology |
|---------|--------------|------------------|-------------------|
| ASO1A   | Sewage Water | ECL20885 (O1)    | Small, clear      |
| ASO1B   | Sewage Water | ECL20885 (O1)    | Small, clear      |
| ASO2A   | Sewage Water | ECL21443 (O2)    | Small, clear      |
| ASO2B   | Sewage Water | ECL21443 (O2)    | Small, clear      |
| ASO78A  | Sewage Water | ECL23026 (O78)   | Small, clear      |
| ASO78B  | Sewage Water | ECL23026 (O78)   | Small, clear      |
| AVIO78A | Hen Feces    | ECL23026 (O78)   | Small, clear      |

**Table S4:** Protein homology of 7 APEC-infecting phages with closely related phages using CoreGenes 3.5.

|                                          |                    |                     |             |       |             |       |               |         |                      |         |              |         |       |                |       |          |
|------------------------------------------|--------------------|---------------------|-------------|-------|-------------|-------|---------------|---------|----------------------|---------|--------------|---------|-------|----------------|-------|----------|
| Comparison phage                         | WV8                | O157 typing phage 1 | HY02        | EC6   | UAB_Phi87   | JH2   | Alf5          | AYO145A | VpaE1                | BPS17L1 | BPS15Q2      | BPS17W1 | Si3   | phage Mushroom | SP116 | Felix 01 |
| % in common with respect to <b>ASO1A</b> | 92.06              | 92.86               | 89.68       | 88.1  | 92.06       | 90.48 | 91.27         | 90.48   | 90.48                | 88.1    | 94.44        | 88.89   | 85.71 | 92.06          | 89.68 | 90.48    |
|                                          |                    |                     |             |       |             |       |               |         |                      |         |              |         |       |                |       |          |
| Comparison phage                         | WV8                | O157 typing phage 1 | HY02        | EC6   | UAB_Phi87   | JH2   | Alf5          | AYO145A | VpaE1                | BPS17L1 | BPS15Q2      | BPS17W1 | Si3   | Mushroom       | SP116 | Felix 01 |
| % in common with respect to <b>ASO1B</b> | 92.13              | 92.91               | 89.76       | 85.83 | 89.76       | 89.76 | 90.55         | 92.13   | 90.55                | 85.83   | 93.7         | 86.61   | 83.34 | 91.34          | 87.4  | 88.19    |
|                                          |                    |                     |             |       |             |       |               |         |                      |         |              |         |       |                |       |          |
| Comparison phage                         | Phage phAPEC8_ev05 |                     | Phage ZCKP1 |       | Phage ESCO5 |       | Phage phAPEC8 |         | Phage Schichermooser |         | Phage ESCO13 |         |       |                |       |          |
| % in common with respect to <b>ASO2A</b> | 92.78              |                     | 88.81       |       | 90.25       |       | 92.06         |         | 93.5                 |         | 94.58        |         |       |                |       |          |

## Continuation of Table S4

|                                            |           |       |               |        |         |               |            |           |         |         |        |         |          |         |        |            |              |         |       |       |        |        |
|--------------------------------------------|-----------|-------|---------------|--------|---------|---------------|------------|-----------|---------|---------|--------|---------|----------|---------|--------|------------|--------------|---------|-------|-------|--------|--------|
| Comparison phage                           | RB14      | RB10  | T4            | Shfl2  | G-C40   | Ime09         | wV7        | E11/2     | ECML134 | pSs-1   | HY01   | phiD1   | PST      | AR1     | HY03   | SHBML-50-1 | CF2          | SF22    | SF21  | SF24  | Slur03 | Slur04 |
| % in common with respect to <b>ASO2A</b>   | 95.55     | 92.22 | 86.3          | 93.7   | 94.44   | 92.96         | 94.81      | 95.19     | 93.7    | 93.33   | 89.63  | 93.7    | 93.7     | 95.19   | 88.89  | 92.22      | 97.04        | 94.07   | 95.19 | 95.19 | 94.44  | 93.7   |
|                                            |           |       |               |        |         |               |            |           |         |         |        |         |          |         |        |            |              |         |       |       |        |        |
| Comparison phage                           | CR44b     | SH3   | SH4           | Dev2   | GW1     | EcpYZU01      | EcoDS1     | vB_EcoP_F | GA2A    | IMM-002 | K1F    | LM33_P1 | Pe3-1    | Ro451W  | ST31   | Vec13      | YZ1          | ZG49    | SFPH2 |       |        |        |
| % in common with respect to <b>ASO78A</b>  | 83.33     | 87.5  | 79.17         | 81.25  | 79.17   | 83.33         | 91.67      | 91.67     | 85.42   | 72.92   | 91.67  | 91.67   | 87.5     | 83.33   | 87.5   | 91.67      | 77.08        | 70.83   | 77.08 |       |        |        |
|                                            |           |       |               |        |         |               |            |           |         |         |        |         |          |         |        |            |              |         |       |       |        |        |
| Comparison phage                           | SenS_SB28 | Skate | LPST10        | IME207 | ViII-E1 | Akira         | 64795_sal3 | KpV2811   | YX3973  | C1      | S1791W | pIS4-A  | StyS-BS5 | KFS-SE2 | VSt472 | DS8        | Sf11 SMD2017 | Pyd38-A |       |       |        |        |
| % in common with respect to <b>ASO78B</b>  | 66.67     | 77.78 | 72.84         | 74.07  | 50.62   | 72.84         | 67.9       | 59.26     | 51.85   | 71.6    | 67.9   | 60.49   | 71.6     | 72.84   | 72.84  | 76.54      | 70.37        | 60.49   |       |       |        |        |
|                                            |           |       |               |        |         |               |            |           |         |         |        |         |          |         |        |            |              |         |       |       |        |        |
| Comparison phage                           | Solent    |       | Vb_SenS_Sasha |        |         | Vb_SenS_Serge |            |           |         |         |        |         |          |         |        |            |              |         |       |       |        |        |
| % in common with respect to <b>AVIO78A</b> | 68.57     |       | 63.81         |        |         | 69.52         |            |           |         |         |        |         |          |         |        |            |              |         |       |       |        |        |
